# Supplementary material
Source: ML conference proceedings conference paper supplement (https://openaccess.thecvf.com/content/ICCV2023/html/Cao_OmniZoomer_Learning_to_ICCV_2023_paper.html)
Supplement: Supplementary file 2 [file Cao_OmniZoomer_Learning_to_ICCV_2023_supplemental.zip]

Archive with 2 entries (2 files):
- 07160-demo.mp4
- 07160-supp.pdf
